# Supplementary material for: Recent advances and perspectives on thin electrolytes for high-energy-density solid-state lithium batteries
Source: Royal Society of Chemistry journal article supplement (doi:10.1039/d0ee02714f), 2020-12-08
Supplement: d0ee02714f1.pdf [file d0ee02714f1.pdf]

## Supporting Information

### Recent Advances and Perspectives on Thin Electrolytes for High-Energy-Density Solid-State Lithium Batteries

Xiaofei Yang,<sup>‡</sup> Keegan Adair,<sup>‡</sup> Xuejie Gao and Xueliang Sun\*

*Department of Mechanical and Materials Engineering, University of Western Ontario, London, Ontario, N6A 5B9, Canada*

**Table S1.** Summary of thin SSEs with thickness of less than 100  $\mu\text{m}$  and their application in SSLBs. (Items in the application column labelled with “pouch cell” in the brackets mean that pouch cells are in the references but didn’t cycle them. SSLBs with “pouch cell +” in the brackets indicate that pouch cells are shown in the references with performance testing. CQDs: Carbon quantum dots; LSPS:  $\text{Li}_{10}\text{SnP}_2\text{S}_{12}$ ; LLCZNO:  $\text{Li}_7\text{La}_{2.75}\text{Zr}_{1.75}\text{Nb}_{0.25}\text{O}_{12}$ ; SEBS: polystyrene-block-poly(ethylene-ran-butylene)-block-polystyrene; SN: succinonitrile; PI: polyimide; KF: Kevlar fiber; PES: polyethylene sulphide; NW: poly(paraphenyleneterephthalamide) nonwoven; LiBETI:  $\text{LiN}(\text{SO}_2\text{CF}_2\text{CF}_3)_2$ ; SBC: Styrene-butadiene copolymer; LGTP: Gallium-doped  $\text{LiTi}_2(\text{PO}_4)_3$ ; PEGDME: Poly(ethylene glycol) dimethyl ether; polyDOL: poly(1,3-dioxolane); PEGDA: poly(ethylene glycol) diacrylate; PEGDE: poly(ethylene glycol) diglycidyl ether).

| Fabrication method | SSE                               | Thickness ( $\mu\text{m}$ ) | Application                   | Reference |
|--------------------|-----------------------------------|-----------------------------|-------------------------------|-----------|
| Slurry casting     | $\text{Li}_6\text{PS}_5\text{Cl}$ | 30                          | Ag-C/NMC90.50.5 (Pouch cell+) | 1         |
|                    | $\beta\text{-Li}_3\text{PS}_4$    | 21                          | Li/NMC622                     | 2         |
|                    | LLZO                              | 5                           | Li/LCO                        | 3         |
|                    | $\text{Li}_3\text{PS}_4$          | 59                          | Graphite/NMC111               | 4         |
|                    | PAN-LAGP-PEGDA                    | 25                          | Li-NMC811 (Pouch cell+)       | 5         |
|                    | LLZO                              | 3-5                         | Li/LFP                        | 6         |
|                    | $\text{Li}_3\text{PS}_4$          | 50                          | Graphite-NMC111 (Pouch cell+) | 7         |
|                    | $\text{Li}_6\text{PS}_5\text{Cl}$ | 30                          | Graphite-NMC622 (Pouch cell+) | 8         |
| Solution casting   | PEO-CDQs                          | 80                          | Li/LFP                        | 9         |

|                   |                                                        |        |                         |    |
|-------------------|--------------------------------------------------------|--------|-------------------------|----|
|                   | PEO-LSPS                                               | 70     | Li/S                    | 10 |
|                   | PEO-LLTO                                               | 15±5   | Li/S                    | 11 |
|                   | PEO-Li <sub>7</sub> P <sub>3</sub> S <sub>11</sub>     | 50     | -                       | 12 |
|                   | PEO                                                    | 40     | Li/LCO<br>(Pouch cell)  | 13 |
|                   | PEO                                                    | 9.5    | Li/LFP                  | 14 |
|                   | polyether-LiTFSI                                       | 29     | Li/LFP<br>(Pouch cell+) | 15 |
|                   | PEO-<br>MIL-53(Al)                                     | 60     | Li/S                    | 16 |
|                   | PEO-LLZO                                               | 20-75  | Li/S                    | 17 |
|                   | MIL-53(Al)                                             | 60     | Li/LFP                  | 18 |
|                   | PEO-SiO <sub>2</sub>                                   | 30-150 | Li/LFP                  | 19 |
|                   | PAN-LiClO <sub>4</sub> -<br>BNNF                       | 12     | Li/NMC811               | 20 |
|                   | Garnet                                                 | 15     | Li/S<br>(Pouch cell)    | 21 |
|                   | LAGP                                                   | 75     | -                       | 22 |
|                   | LLTO                                                   | 25-160 | Li/LFP                  | 23 |
|                   | LLZO                                                   | 14-20  | Li/S<br>(Pouch cell+)   | 24 |
| Tape casting      | LLCZNO                                                 | 35     | Li/S                    | 25 |
|                   | LLZO                                                   | 20     | Li/NMC622               | 26 |
|                   | Garnet                                                 | 30     | -                       | 27 |
|                   | LLZO                                                   | <30    | -                       | 28 |
|                   | LLZO                                                   | 25     | -                       | 29 |
|                   | LLZO                                                   | 20     | Li/S                    | 30 |
|                   | LAGP                                                   | 70     | -                       | 31 |
|                   | PEG-Ti- Li <sub>7</sub> P <sub>3</sub> S <sub>11</sub> | 10     | Li/LFP                  | 32 |
| Solution infusion | PEO-LATP                                               | 100    | -                       | 33 |
|                   | LLZTO-SN-<br>LITFSI                                    | 100    | Li/LFP&Li/NMC532        | 34 |

|                        |                                                                        |       |                                                   |    |
|------------------------|------------------------------------------------------------------------|-------|---------------------------------------------------|----|
|                        | LLZTO-PAN-LiClO <sub>4</sub>                                           | 25    | Li/LNMO                                           | 35 |
|                        | Polyethylene-PEO                                                       | 7.5   | Li/LFP&Li/S<br>(Pouch cell)                       | 36 |
|                        | PI-PEO                                                                 | 8.6   | Li/LFP<br>(Pouch cell)                            | 37 |
|                        | PI-Li <sub>6</sub> PS <sub>5</sub> Cl <sub>0.5</sub> Br <sub>0.5</sub> | 40-70 | Graphite/NMC622                                   | 38 |
|                        | PEO-LLZO                                                               | 40-50 | -                                                 | 39 |
|                        | Celgard3501-PEGDME                                                     | 50    | Li/LFP&Li/NMC532<br>(Pouch cell+)                 | 40 |
|                        | KF-PES-Li <sub>3</sub> PS <sub>4</sub>                                 | 60    | Li/NCA                                            | 41 |
|                        | KF-Li <sub>3</sub> PS <sub>4</sub>                                     | 100   | Li/S                                              | 42 |
| Cold/Hot press         | [C2mpyr][BF4]-PVDF                                                     | 30    | Li/LFP                                            | 43 |
|                        | NW-Li <sub>3</sub> PS <sub>4</sub>                                     | 70    | LTO/LCO                                           | 44 |
|                        | 77.5Li <sub>2</sub> S-22.5P <sub>2</sub> S <sub>5</sub>                | 100   | Li/FeS <sub>2</sub>                               | 45 |
|                        | β-Li <sub>3</sub> PS <sub>4</sub>                                      | 6-35  | -                                                 | 46 |
|                        | PEO-LGPS                                                               | 100   | Li/S                                              | 47 |
|                        | PEO-LLZO                                                               | <100  | -                                                 | 48 |
| Extrusion              | PEO-LiBETI                                                             | 80-90 | Li/V <sub>2</sub> O <sub>5</sub><br>(Pouch cell+) | 49 |
| 3D printing            | LLZO                                                                   | 5-10  | -                                                 | 50 |
|                        | SBC-LLZO                                                               | 100   | -                                                 | 51 |
| Hydrothermal           | LATP                                                                   | 40-90 | Graphite/LFP                                      | 52 |
|                        | LGTP                                                                   | ~100  | -                                                 | 53 |
| Solvent evaporation    | β-Li <sub>3</sub> PS <sub>4</sub>                                      | 30    | -                                                 | 54 |
|                        | 75.51Li <sub>2</sub> S-24.49P <sub>2</sub> S <sub>5</sub>              | 1.5   | -                                                 | 55 |
| In-Situ polymerization | PolyDOL                                                                | ~25   | Li/NMC622&Li/S                                    | 56 |
|                        | LLZO-PEGDA                                                             | 36    | Li/LFP                                            | 57 |
|                        | PEGDA-PEGDE                                                            | 90    | Li/LFP                                            | 58 |

---

(Pouch cell)

---

|              |      |      |                   |    |
|--------------|------|------|-------------------|----|
|              | LLTO | 19.8 | Li/O <sub>2</sub> | 59 |
| Spin coating | LATP | 36   | Li/O <sub>2</sub> | 60 |
|              | LATP | 20   | Li/O <sub>2</sub> | 61 |

---

**Table S2.** The criteria of the SSEs to meet the requirements of different SSLBs.

| SSLB system | Requirements for SSE                                                                                                                                                              | SSE type                                                                                                                                                            |
|-------------|-----------------------------------------------------------------------------------------------------------------------------------------------------------------------------------|---------------------------------------------------------------------------------------------------------------------------------------------------------------------|
| Li-LFP      | Oxidization stability potential:<br>>4.0 V<br>Stable against Li<br>Ionic conductivity:>10 <sup>-3</sup> S cm <sup>-1</sup>                                                        | SPEs<br>Oxide (interface modification)                                                                                                                              |
| Li-LCO/NMC  | Oxidization stability potential:<br>>4.2 V<br>Stable against Li<br>Ionic conductivity:>10 <sup>-3</sup> S cm <sup>-1</sup>                                                        | Multi-layered SPEs (or modified SPEs)<br>Oxide (interface modification)<br>Halide (considering Li reduction)<br>Sulfide (Cathode materials should be protected)     |
| Li-S        | Oxidization stability window:<br>>3 V<br>Stable against Li<br>Ionic conductivity:>10 <sup>-3</sup> S cm <sup>-1</sup>                                                             | SPEs (Considering shuttle effect)<br>Oxide (Interface modification, Considering LiPS and Li reduction)<br>Sulfide (Considering electrolyte decomposition by carbon) |
| Li-O2/air   | Oxidization stability potential:<br>>4.2 V<br>Stable against Li<br>Ionic conductivity:>10 <sup>-3</sup> S cm <sup>-1</sup><br>Air stability (O <sub>2</sub> and H <sub>2</sub> O) | SPEs (considering high-voltage oxidization)<br>Oxide (Interface modification)                                                                                       |

**Table S3.** Parameters used for energy density calculations of the selected battery systems.

| Battery system | Average Voltage (V) | Cathode                             |                                            |                              | Anode                               |                                            |                              |
|----------------|---------------------|-------------------------------------|--------------------------------------------|------------------------------|-------------------------------------|--------------------------------------------|------------------------------|
|                |                     | Press Density (g cm <sup>-3</sup> ) | Reversible Capacity (mAh g <sup>-1</sup> ) | Initial Coulombic Efficiency | Press Density (g cm <sup>-3</sup> ) | Reversible Capacity (mAh g <sup>-1</sup> ) | Initial Coulombic Efficiency |
| Li-LFP         | 3.2                 | 2.25 (90 wt.%)                      | 170                                        | 98%                          | 0.53                                | 3860                                       | 100%                         |
|                |                     | 2.22 (85 wt.%)                      |                                            |                              |                                     |                                            |                              |
|                |                     | 2.18 (80 wt.%)                      |                                            |                              |                                     |                                            |                              |
| Li-LCO         | 3.95                | 4.03 (90 wt.%)                      | 190                                        | 97%                          | 0.53                                | 3860                                       | 100%                         |
|                |                     | 3.90 (85 wt.%)                      |                                            |                              |                                     |                                            |                              |
|                |                     | 3.77 (80 wt.%)                      |                                            |                              |                                     |                                            |                              |
| Li-NMC-811     | 3.8                 | 3.38 (90 wt.%)                      | 210                                        | 90%                          | 0.53                                | 3860                                       | 100%                         |
|                |                     | 3.28 (85 wt.%)                      |                                            |                              |                                     |                                            |                              |
|                |                     | 3.19 (80 wt.%)                      |                                            |                              |                                     |                                            |                              |
| Li-Li-rich     | 4.0                 | 2.63 (90 wt.%)                      | 300                                        | 90%                          |                                     | 3860                                       | 100%                         |
|                |                     | 2.57 (85 wt.%)                      |                                            |                              |                                     |                                            |                              |
|                |                     | 2.52 (80 wt.%)                      |                                            |                              |                                     |                                            |                              |
| Li-S           | 2.1                 | 0.86-0.94 (70 wt.%)                 | 1338                                       | 100%                         | 0.53                                | 3860                                       | 100%                         |
|                |                     | 0.71-0.79 (60 wt.%)                 |                                            |                              |                                     |                                            |                              |
|                |                     | 0.60-0.68 (50 wt.%)                 |                                            |                              |                                     |                                            |                              |

**Table S4.** Typical technological parameters of a Li-LCO pouch cell with a fixed size of 138 mm × 81.8 mm × 6.44 mm.

| Component of Cell | Parameter                                                      | Value   |
|-------------------|----------------------------------------------------------------|---------|
| Cathode           | Material                                                       | LCO     |
|                   | Reversible capacity (mAh g <sup>-1</sup> )                     | 190     |
|                   | Initial Coulombic efficiency (%)                               | 97      |
|                   | Unilateral areal density (mg cm <sup>-2</sup> each side of Al) | 24.02   |
|                   | Active material ratio (%)                                      | 85      |
|                   | Press density (g cm <sup>-3</sup> )                            | 3.90    |
|                   | Unilateral thickness (μm)                                      | 61.6    |
|                   | Thickness of Al (μm)                                           | 16      |
|                   | Length (mm)                                                    | 120     |
|                   | Width (mm)                                                     | 73      |
|                   | layer                                                          | 22      |
| Anode             | Material                                                       | Li      |
|                   | Reversible capacity (mAh g <sup>-1</sup> )                     | 3860    |
|                   | Initial Coulombic efficiency (%)                               | 100     |
|                   | Unilateral areal density (mg cm <sup>-2</sup> each side of Cu) | 2.07    |
|                   | Active material ratio (%)                                      | 100     |
|                   | Press density (g cm <sup>-3</sup> )                            | 0.53    |
|                   | Unilateral thickness (μm)                                      | 39.10   |
|                   | Thickness of Cu (μm)                                           | 8       |
|                   | Length (mm)                                                    | 123     |
|                   | Width (mm)                                                     | 76      |
|                   | layer                                                          | 23      |
| Electrolyte       | Material                                                       | LGPS    |
|                   | Thickness (μm)                                                 | 30      |
|                   | Length (mm)                                                    | 126     |
|                   | Width (mm)                                                     | 76      |
|                   | layer                                                          | 44      |
| Sealing film      | Thickness (μm)                                                 | 152     |
| Cell              | Voltage (V)                                                    | 3.95    |
|                   | Capacity (Ah)                                                  | 14.955  |
|                   | Mass (kg)                                                      | 0.16185 |
|                   | Volume (L)                                                     | 0.0753  |
|                   | Gravimetric energy density (Wh kg <sup>-1</sup> )              | 365.0   |
|                   | Volumetric energy density (Wh L <sup>-1</sup> )                | 784.5   |

## References

1. Y.-G. Lee, S. Fujiki, C. Jung, N. Suzuki, N. Yashiro, R. Omoda, D.-S. Ko, T. Shiratsuchi, T. Sugimoto, S. Ryu, J. H. Ku, T. Watanabe, Y. Park, Y. Aihara, D. Im and I. T. Han, *Nat. Energy*, 2020, **5**, 299-308.
2. T. Ates, M. Keller, J. Kulisch, T. Adermann and S. Passerini, *Energy Storage Mater.*, 2019, **17**, 204-210.
3. X. Yan, Z. Li, H. Ying, F. Nie, L. Xue, Z. Wen and W.-Q. Han, *Ionics*, 2017, **24**, 1545-1551.
4. M. Yamamoto, Y. Terauchi, A. Sakuda and M. Takahashi, *Sci. Rep.*, 2018, **8**, 1212.
5. H. Duan, M. Fan, W. P. Chen, J. Y. Li, P. F. Wang, W. P. Wang, J. L. Shi, Y. X. Yin, L. J. Wan and Y. G. Guo, *Adv. Mater.*, 2019, **31**, e1807789.
6. X. Yan, Z. Li, Z. Wen and W. Han, *J. Phys. Chem. C*, 2017, **121**, 1431-1435.
7. A. Sakuda, K. Kuratani, M. Yamamoto, M. Takahashi, T. Takeuchi and H. Kobayashi, *J. Electrochem. Soc.*, 2017, **164** A2474-A2478.
8. Y. J. Nam, D. Y. Oh, S. H. Jung and Y. S. Jung, *J. Power Sources*, 2018, **375**, 93-101.
9. C. Ma, K. Dai, H. Hou, X. Ji, L. Chen, D. G. Ivey and W. Wei, *Adv. Sci.*, 2018, **5**, 1700996.
10. X. Li, D. Wang, H. Wang, H. Yan, Z. Gong and Y. Yang, *ACS Appl. Mater. Interfaces.*, 2019, **11**, 22745-22753.
11. P. Zhu, C. Yan, J. Zhu, J. Zang, Y. Li, H. Jia, X. Dong, Z. Du, C. Zhang, N. Wu, M. Dirican and X. Zhang, *Energy Storage Mater.*, 2019, **17**, 220-225.
12. D. H. S. Tan, A. Banerjee, Z. Deng, E. A. Wu, H. Nguyen, J.-M. Doux, X. Wang, J.-h. Cheng, S. P. Ong, Y. S. Meng and Z. Chen, *ACS Appl. Energy Mater.*, 2019, **2**, 6542-6550.
13. C. Wang, T. Wang, L. Wang, Z. Hu, Z. Cui, J. Li, S. Dong, X. Zhou and G. Cui, *Adv. Sci.*, 2019, **6**, 1901036.
14. X. Chen, W. He, L.-X. Ding, S. Wang and H. Wang, *Energy Environ. Sci.*, 2019, **12**, 938-944.
15. P. Hovington, M. Lagace, A. Guerfi, P. Bouchard, A. Mauger, C. M. Julien, M. Armand and K. Zaghib, *Nano Lett.*, 2015, **15**, 2671-2678.
16. C. Zhang, Y. Lin, Y. Zhu, Z. Zhang and J. Liu, *RSC Adv.*, 2017, **7**, 19231-19236.
17. X. Tao, Y. Liu, W. Liu, G. Zhou, J. Zhao, D. Lin, C. Zu, O. Sheng, W. Zhang, H. W. Lee and Y. Cui, *Nano Lett.*, 2017, **17**, 2967-2972.
18. K. Zhu, Y. Liu and J. Liu, *RSC Adv.*, 2014, **4**, 42278-42284.
19. D. Lin, P. Y. Yuen, Y. Liu, W. Liu, N. Liu, R. H. Dauskardt and Y. Cui, *Adv. Mater.*, 2018, **30**, 1802661.
20. K. Liu, M. Wu, H. Jiang, Y. Lin and T. Zhao, *J. Mater. Chem. A*, 2020, **8**, 18802-18809.
21. S. Xu, D. W. McOwen, L. Zhang, G. T. Hitz, C. Wang, Z. Ma, C. Chen, W. Luo, J. Dai, Y. Kuang, E. M. Hitz, K. Fu, Y. Gong, E. D. Wachsman and L. Hu, *Energy Storage Mater.*, 2018, **15**, 458-464.
22. M. Zhang, Z. Huang, J. Cheng, O. Yamamoto, N. Imanishi, B. Chi, J. Pu and J. Li, *J. Alloys Compd.*, 2014, **590**, 147-152.
23. Z. Jiang, S. Wang, X. Chen, W. Yang, X. Yao, X. Hu, Q. Han and H. Wang, *Adv. Mater.*, 2020, **32**, e1906221.



24. G. T. Hitz, D. W. McOwen, L. Zhang, Z. Ma, Z. Fu, Y. Wen, Y. Gong, J. Dai, T. R. Hamann, L. Hu and E. D. Wachsman, *Mater. Today*, 2019, **22**, 50-57.
25. K. Fu, Y. Gong, G. T. Hitz, D. W. McOwen, Y. Li, S. Xu, Y. Wen, L. Zhang, C. Wang, G. Pastel, J. Dai, B. Liu, H. Xie, Y. Yao, E. D. Wachsman and L. Hu, *Energy Environ. Sci.*, 2017, **10**, 1568-1575.
26. H. Shen, E. Yi, M. Amores, L. Cheng, N. Tamura, D. Y. Parkinson, G. Chen, K. Chen and M. Doeff, *J. Mater. Chem. A*, 2019, **7**, 20861-20870.
27. S. Xu, D. W. McOwen, C. Wang, L. Zhang, W. Luo, C. Chen, Y. Li, Y. Gong, J. Dai, Y. Kuang, C. Yang, T. R. Hamann, E. D. Wachsman and L. Hu, *Nano Lett.*, 2018, **18**, 3926-3933.
28. E. Yi, W. Wang, J. Kieffer and R. M. Laine, *J. Mater. Chem. A*, 2016, **4**, 12947-12954.
29. E. Yi, W. Wang, J. Kieffer and R. M. Laine, *J. Power Sources*, 2017, **352**, 156-164.
30. Y. Gong, K. Fu, S. Xu, J. Dai, T. R. Hamann, L. Zhang, G. T. Hitz, Z. Fu, Z. Ma, D. W. McOwen, X. Han, L. Hu and E. D. Wachsman, *Mater. Today*, 2018, **21**, 594-601.
31. A. Paoletta, W. Zhu, G. L. Xu, A. La Monaca, S. Savoie, G. Girard, A. Vjih, H. Demers, A. Perea, N. Delaporte, A. Guerfi, X. Liu, Y. Ren, C. J. Sun, J. Lu, K. Amine and K. Zaghib, *Adv. Energy Mater.*, 2020, **10**, 2001497.
32. T.-J. Cai, Y.-H. Lo and J.-J. Wu, *Mater. Today Energy*, 2019, **13**, 119-124.
33. H. Zhai, P. Xu, M. Ning, Q. Cheng, J. Mandal and Y. Yang, *Nano Lett.*, 2017, **17**, 3182-3187.
34. T. Jiang, P. He, G. Wang, Y. Shen, C. W. Nan and L. Z. Fan, *Adv. Energy Mater.*, 2020, **10**, 1903376.
35. C. Hu, Y. Shen, M. Shen, X. Liu, H. Chen, C. Liu, T. Kang, F. Jin, L. Li, J. Li, Y. Li, N. Zhao, X. Guo, W. Lu, B. Hu and L. Chen, *J Am Chem Soc*, 2020, **142**, 18035-18041.
36. J. Wu, Z. Rao, Z. Cheng, L. Yuan, Z. Li and Y. Huang, *Adv. Energy Mater.*, 2019, **9**, 1902767.
37. J. Wan, J. Xie, X. Kong, Z. Liu, K. Liu, F. Shi, A. Pei, H. Chen, W. Chen, J. Chen, X. Zhang, L. Zong, J. Wang, L. Q. Chen, J. Qin and Y. Cui, *Nat. Nanotechnol.*, 2019, **14**, 705-711.
38. D. H. Kim, Y.-H. Lee, Y. B. Song, H. Kwak, S.-Y. Lee and Y. S. Jung, *ACS Energy Lett.*, 2020, **5**, 718-727.
39. K. K. Fu, Y. Gong, J. Dai, A. Gong, X. Han, Y. Yao, C. Wang, Y. Wang, Y. Chen, C. Yan, Y. Li, E. D. Wachsman and L. Hu, *Proc. Natl. Acad. Sci. U.S.A.*, 2016, **113**, 7094-7099.
40. X. Yang, M. Jiang, X. Gao, D. Bao, Q. Sun, N. Holmes, H. Duan, S. Mukherjee, K. Adair, C. Zhao, J. Liang, W. Li, J. Li, Y. Liu, H. Huang, L. Zhang, S. Lu, Q. Lu, R. Li, C. V. Singh and X. Sun, *Energy Environ. Sci.*, 2020, **13**, 1318-1325.
41. Y. Li, X. Wang, H. Zhou, X. Xing, A. Banerjee, J. Holoubek, H. Liu, Y. S. Meng and P. Liu, *ACS Energy Lett.*, 2020, **5**, 955-961.
42. R. Xu, J. Yue, S. Liu, J. Tu, F. Han, P. Liu and C. Wang, *ACS Energy Lett.*, 2019, **4**, 1073-1079.
43. P. C. Howlett, F. Ponzio, J. Fang, T. Lin, L. Jin, N. Iranipour and J. Efthimiadis, *Phys. Chem. Chem. Phys.*, 2013, **15**, 13784-13789.

44. Y. J. Nam, S. J. Cho, D. Y. Oh, J. M. Lim, S. Y. Kim, J. H. Song, Y. G. Lee, S. Y. Lee and Y. S. Jung, *Nano Lett.*, 2015, **15**, 3317-3323.
45. J. M. Whiteley, P. Taynton, W. Zhang and S.-H. Lee, *Adv. Mater.*, 2015, **27**, 6922-6927.
46. Z. D. Hood, H. Wang, A. S. Pandian, R. Peng, K. D. Gilroy, M. Chi, C. Liang and Y. Xia, *Adv. Energy Mater.*, 2018, **8**, 1800014.
47. M. Li, J. E. Frerichs, M. Kolek, W. Sun, D. Zhou, C. J. Huang, B. J. Hwang, M. R. Hansen, M. Winter and P. Bieker, *Adv. Funct. Mater.*, 2020, **30**, 1910123.
48. M. Keller, G. B. Appetecchi, G.-T. Kim, V. Sharova, M. Schneider, J. Schuhmacher, A. Roters and S. Passerini, *J. Power Sources*, 2017, **353**, 287-297.
49. G. B. Appetecchi, J. H. Shin, F. Alessandrini and S. Passerini, *J. Power Sources*, 2005, **143**, 236-242.
50. D. W. McOwen, S. Xu, Y. Gong, Y. Wen, G. L. Godbey, J. E. Gritton, T. R. Hamann, J. Dai, G. T. Hitz, L. Hu and E. D. Wachsman, *Adv. Mater.*, 2018, **30**, e1707132.
51. H. Xie, Y. Bao, J. Cheng, C. Wang, E. M. Hitz, C. Yang, Z. Liang, Y. Zhou, S. He, T. Li and L. Hu, *ACS Energy Lett.*, 2019, **4**, 2668-2674.
52. C. Peng, Y. Kamiike, Y. Liang, K. Kuroda and M. Okido, *ACS Sustain. Chem. Eng.*, 2019, **7**, 10751-10762.
53. Y. Liang, C. Peng, Y. Kamiike, K. Kuroda and M. Okido, *J. Alloys Compd.*, 2019, **775**, 1147-1155.
54. H. Wang, Z. D. Hood, Y. Xia and C. Liang, *J. Mater. Chem. A*, 2016, **4**, 8091-8096.
55. S. P. Woo, N. Kakati, I. Y. Kim, S. H. Lee and Y. S. Yoon, *J. Korean Phys. Soc.*, 2016, **69**, 617-622..
56. Q. Zhao, X. Liu, S. Stalin, K. Khan and L. A. Archer, *Nat. Energy*, 2019, **4**, 365-373.
57. H. Duan, Y. X. Yin, Y. Shi, P. F. Wang, X. D. Zhang, C. P. Yang, J. L. Shi, R. Wen, Y. G. Guo and L. J. Wan, *J. Am. Chem. Soc.*, 2018, **140**, 82-85.
58. H. Duan, Y.-X. Yin, X.-X. Zeng, J.-Y. Li, J.-L. Shi, Y. Shi, R. Wen, Y.-G. Guo and L.-J. Wan, *Energy Storage Mater.*, 2018, **10**, 85-91.
59. H. T. T. Le, D. T. Ngo, P. N. Didwal, J. G. Fisher, C.-N. Park, I.-D. Kim and C.-J. Park, *J. Mater. Chem. A*, 2019, **7**, 3150-3160.
60. X. B. Zhu, T. S. Zhao, Z. H. Wei, P. Tan and G. Zhao, *Energy Environ. Sci.*, 2015, **8**, 2782-2790.
61. X. Zhu, T. Zhao, P. Tan, Z. Wei and M. Wu, *Nano Energy*, 2016, **26**, 565-576.
